# Supplementary material for: Ionospheric Behavior during the 10 June 2021 Annular Solar Eclipse and Its Impact on GNSS Precise Point Positioning
Source: MDPI journal article supplement (doi:10.3390/rs14133119), 2022-06-29
Supplement: s1 [file s1]

# Supplementary Materials: Ionospheric Behavior During the 10 June 2021 Annular Solar Eclipse and Its Impact on GNSS Precise Point Positioning

Juan Carlos Valdés-Abreu <sup>1,2</sup> , Marcos A. Díaz <sup>1,2\*</sup> , Manuel Bravo <sup>3,4</sup> , Juan Carlos Báez <sup>5</sup> , and Yohadne Stable-Sánchez <sup>1</sup> 

<sup>1</sup> Space and Planetary Exploration Laboratory (SPEL), Faculty of Physical and Mathematical Sciences, University of Chile, Av. Tupper 2007, Santiago 8370451, Chile; juanvaldes@ug.uchile.cl (J.C.V-A.); spel@ing.uchile.cl (Y.S.-S.)

<sup>2</sup> Department of Electrical Engineering, Faculty of Physical and Mathematical Sciences, University of Chile, Av. Tupper 2007, Santiago 8370451, Chile.

<sup>3</sup> Centro de Instrumentación Científica, Universidad Adventista de Chile, km 12 Camino a Tanilvoro, Chillan 3780000, Chile; manuelbravo@unach.cl

<sup>4</sup> Department of Geophysics, Faculty of Physical and Mathematical Sciences, University of Concepcion, Av. Esteban Iturra s/n – Barrio Universitario, Concepcion 4091124, Chile.

<sup>5</sup> National Seismological Center, Faculty of Physical and Mathematical Sciences, University of Chile, Av. Beaucheff 1225, Santiago 8370583, Chile; jcbaez@csn.uchile.cl

Correspondence: mdiazq@ing.uchile.cl

## Contents of this file

Figure S1: Ionospheric TEC maps during the 10 June 2021 Annular Solar Eclipse on the world and Northern Hemisphere polar.

Figure S2: DVTEC[TECu] maps using the Kriging interpolation method to the eclipse day.

Table S1: Mean and standard deviation for each map of Figure S2.

Table S2: 3D-RMS in Greenland and South America.

Table S3: Maximum 3D positioning error in Greenland and South America.

Table S4: ROTI in Greenland and South America.

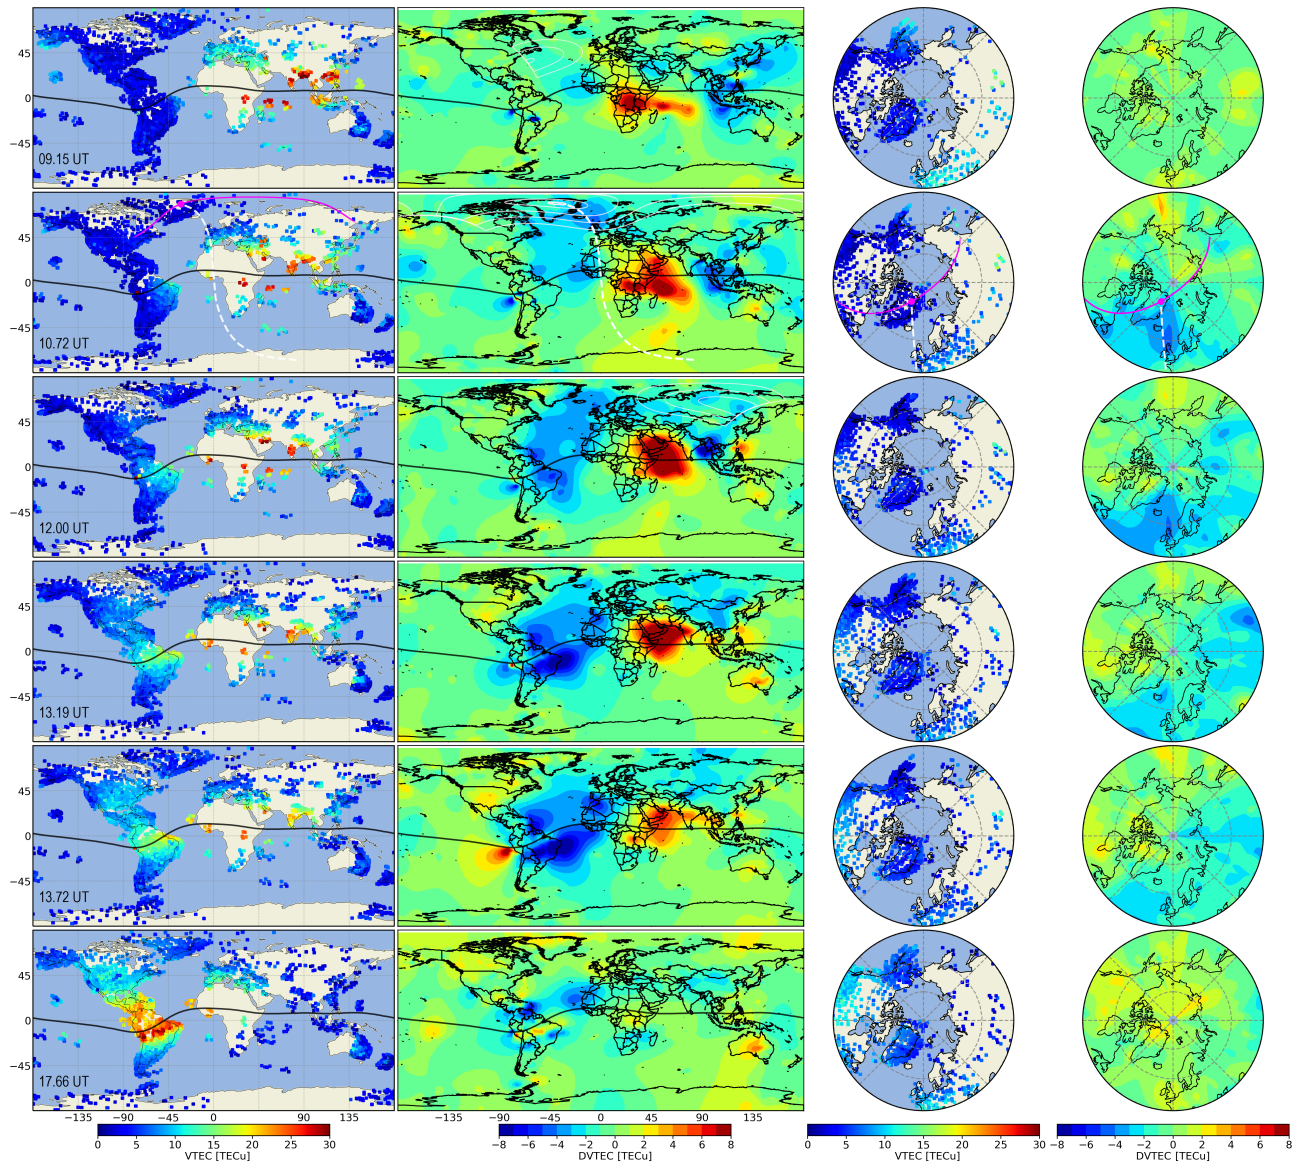

**Figure S1.** Ionospheric TEC maps during the 10 June 2021 Annular Solar Eclipse. World in cylindrical equidistant projection (**left, center-left panels**); and Northern Hemisphere polar plots between 45° N and 90° N (**right, center-right panels**). VTEC<sub>e</sub> at IPP (**left, center-right panels**). DVTEC [TECu] using the Kriging interpolation method (**center-left, right panels**). From top to bottom panels: 09.15 UT, 10.70 UT (GE time), 12.00 UT, 13.19 UT (P4 time), 13.72 UT, and 17.66 UT. Eclipse obscuration mask from 20% obscuration and with intervals of 20% (white line), annular eclipse path (magenta line) and the maximum obscuration (magenta dot) at 350 km altitude are also shown. The white dashed line start from the maximum obscuration of the solar eclipse to its conjugate location in the southern hemisphere at 350 km altitude.

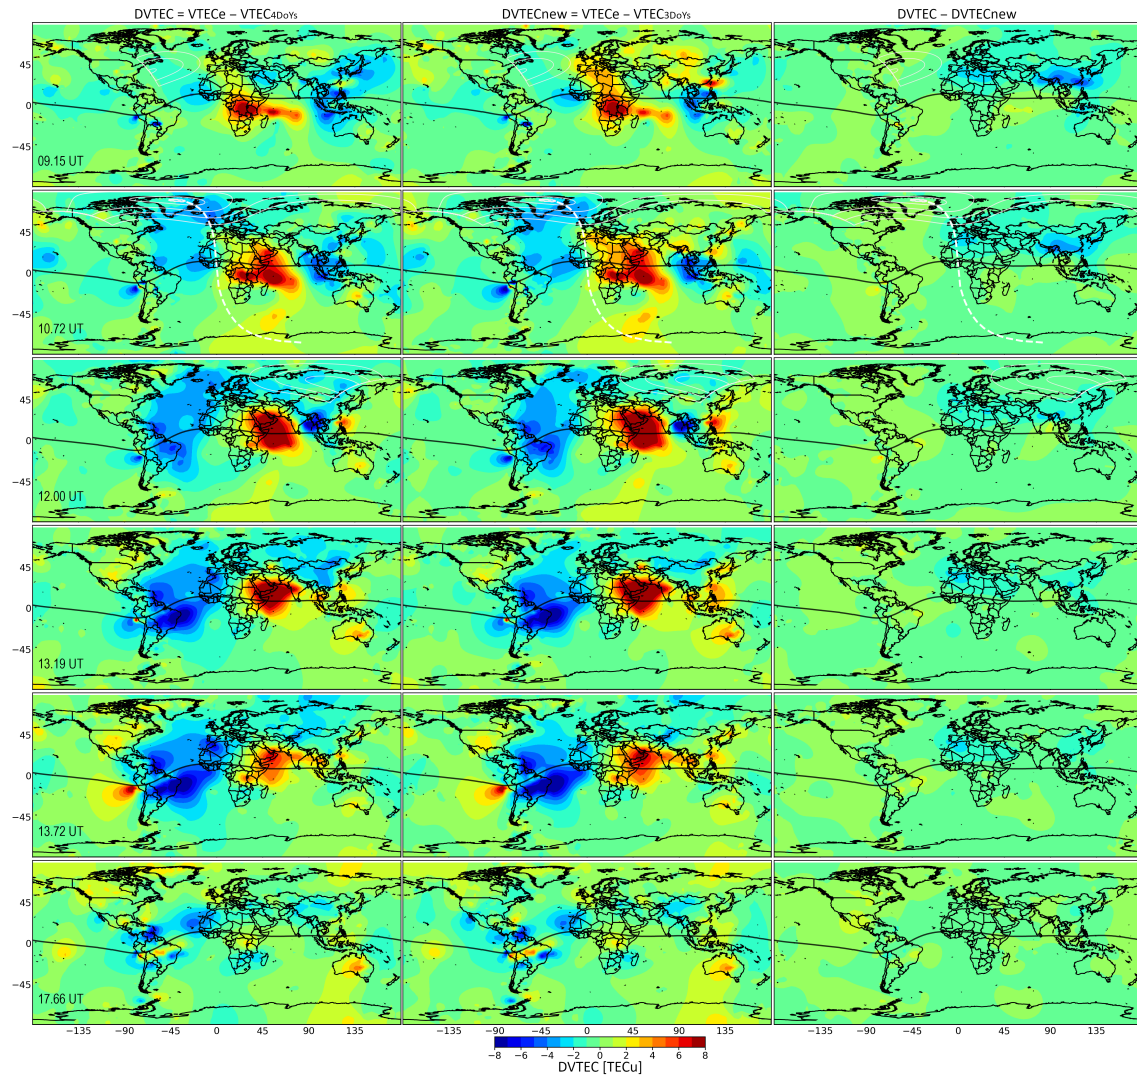

**Figure S2.** DVTEC[TECu] maps using the Kriging interpolation method to the eclipse day. DVTEC estimated with four reference days (DoYs 159, 160, 162, and 163) (**left panels**). DVTECnew calculated with three reference days (DoYs 159, 160, and 163), without the DoY 162 (**middle panels**). DVTEC-DVTECnew (**right panels**). From top to bottom panels: 09.15 UT, 10.70 UT (GE time), 12.00 UT, 13.19 UT (P4 time), 13.72 UT, and 17.66 UT. Eclipse obscuration masks from 20% obscuration and with intervals of 20%, at 350 km altitude (white line) are shown. The white dashed line start from the maximum obscuration of the solar eclipse to its conjugate location in the southern hemisphere.

**Table S1.** Mean and standard deviation for each map of Figure S2 (right panels).

| (DVTEC - DVTEC <sub>new</sub> ) Map | Mean [TECu] | Standard Deviation [TECu] |
|-------------------------------------|-------------|---------------------------|
| 09.15 UT                            | -0.43       | 0.67                      |
| 10.70 UT                            | -0.30       | 0.64                      |
| 12.00 UT                            | -0.25       | 0.52                      |
| 13.15 UT                            | -0.25       | 0.46                      |
| 13.72 UT                            | -0.21       | 0.45                      |
| 17.66 UT                            | 0.01        | 0.39                      |



**Table S2.** 3D-RMS, Greenland (36 stations), South America (335 stations). Where each column represents the percentage of stations with 3D-RMS in certain intervals between 8–14 UT.

| Region        | RMS<br>Intervals<br>[cm] | Percentage of GNSS Stations on DoYs |            |            |            |            |
|---------------|--------------------------|-------------------------------------|------------|------------|------------|------------|
|               |                          | 159<br>[%]                          | 160<br>[%] | 161<br>[%] | 162<br>[%] | 163<br>[%] |
| Greenland     | 3D<2                     | 28                                  | 31         | 2          | 5          | 0          |
|               | 2≤3D<3                   | 67                                  | 64         | 81         | 78         | 86         |
|               | 3≤3D<4                   | 3                                   | 3          | 14         | 11         | 11         |
|               | 4≤3D<5                   | 0                                   | 0          | 0          | 0          | 0          |
|               | 3D≥5                     | 2                                   | 2          | 3          | 6          | 3          |
| South America | 3D<2                     | 32                                  | 30         | 17         | 20         | 33         |
|               | 2≤3D<3                   | 54                                  | 53         | 61         | 56         | 51         |
|               | 3≤3D<4                   | 9                                   | 11         | 13         | 16         | 10         |
|               | 4≤3D<5                   | 3                                   | 4          | 6          | 5          | 4          |
|               | 3D≥5                     | 2                                   | 2          | 3          | 3          | 2          |

**Table S3.** Maximum 3D positioning error, Greenland (36 stations), South America (335 stations). Where each column represents the percentage of stations with maximum 3D positioning error in certain intervals between 8–14 UT.

| Region        | MAX<br>Intervals<br>[cm] | Percentage of GNSS Stations on DoYs |            |            |            |            |
|---------------|--------------------------|-------------------------------------|------------|------------|------------|------------|
|               |                          | 159<br>[%]                          | 160<br>[%] | 161<br>[%] | 162<br>[%] | 163<br>[%] |
| Greenland     | 3D<5                     | 0                                   | 0          | 0          | 0          | 0          |
|               | 5≤3D<10                  | 86                                  | 53         | 41         | 33         | 50         |
|               | 10≤3D<20                 | 8                                   | 44         | 56         | 58         | 47         |
|               | 20≤3D<40                 | 6                                   | 3          | 3          | 6          | 0          |
|               | 3D≥40                    | 0                                   | 0          | 0          | 3          | 3          |
| South America | 3D<5                     | 8                                   | 8          | 8          | 7          | 7          |
|               | 5≤3D<10                  | 72                                  | 66         | 58         | 59         | 67         |
|               | 10≤3D<20                 | 19                                  | 24         | 31         | 32         | 24         |
|               | 20≤3D<40                 | 1                                   | 2          | 3          | 2          | 2          |
|               | 3D≥40                    | 0                                   | 0          | 0          | 0          | 0          |

**Table S4.** Maximum ROTI, Greenland (36 stations), South America (335 stations). Where each column represents the percentage of stations with a maximum ROTI in certain intervals between 8–14 UT.

| Region        | ROTI<br>Intervals<br>[TECu/min] | Percentage of GNSS Stations on DoYs |            |            |            |            |
|---------------|---------------------------------|-------------------------------------|------------|------------|------------|------------|
|               |                                 | 159<br>[%]                          | 160<br>[%] | 161<br>[%] | 162<br>[%] | 163<br>[%] |
| Greenland     | 0.25<ROTI                       | 6                                   | 39         | 39         | 0          | 0          |
|               | 0.25≤ROTI<0.5                   | 22                                  | 11         | 14         | 0          | 36         |
|               | 0.5≤ROTI<1                      | 28                                  | 19         | 8          | 28         | 17         |
|               | ROTI≥1                          | 44                                  | 31         | 39         | 72         | 47         |
| South America | 0.25<ROTI                       | 88                                  | 84         | 89         | 76         | 85         |
|               | 0.25≤ROTI<0.5                   | 10                                  | 14         | 7          | 22         | 13         |
|               | 0.5≤ROTI<1                      | 1                                   | 1          | 1          | 1          | 1          |
|               | ROTI≥1                          | 1                                   | 1          | 3          | 1          | 1          |
